# Supplementary material for: Investigating asthma comorbidities: a systematic scoping review protocol
Source: PubMed Central journal article supplement — BMJ Open. 2016 Aug 24;6(8):e010548. doi: 10.1136/bmjopen-2015-010548 (PMC5013427; doi:10.1136/bmjopen-2015-010548), 2016-08-24
Supplement: bmjopen-2015-010548supp_appendix.pdf [file bmjopen-2015-010548supp_appendix.pdf]

## Appendix

### *Search Strategy*

#### **I. Medline**

1. asthma.mp. or exp Asthma/
2. exp Comorbidity/ or co-morbidity.mp.
3. multimorbidity.mp.
4. exp Hypersensitivity/ or Allergens/ or Hypersensitivity, Immediate/ or atopy.mp. or exp Immunoglobulin E/ or exp Dermatitis, Atopic/
5. allergic rhinitis.mp. or exp Rhinitis, Allergic/
6. food allergy.mp. or exp Food Hypersensitivity/
7. exp Anaphylaxis/ or anaphylaxis.mp.
8. exp Urticaria/ or urticaria.mp.
9. exp Celiac Disease/ or Autoantibodies/ or exp Autoimmune Diseases/ or autoimmune disorder.mp. or exp Diabetes, Type 1/ or exp eosinophilic disorder
10. Thymus Neoplasms/ or endocrine disorder.mp. or Thyroid Gland/ or exp Endocrine System Diseases/ or Thyroid Diseases/
11. exp Obesity/ or exp Diabetes, Type 2/ or metabolic disorder.mp.
12. exp Depression/ or exp Mental Disorder/ or exp Stress, Psychological/ or psychological dysfunction.mp. or Stress Disorder, Post-Traumatic/
13. panic disorders.mp. or exp Panic Disorder/
14. exp Anxiety/ or anxiety.mp.
15. chronic obstructive pulmonary disease.mp. or exp Pulmonary Disease, Chronic Obstructive/
16. exp Hypertension/ or hypertension.mp.
17. exp Gastroesophageal Reflux/ or gastro-oesophageal reflux disease.mp.
18. exp Sleep Apnea, Obstructive/ or exp Sleep Disorder/ or Sleep Apnea Syndromes/ or obstructive sleep apnoea.mp. or Apnea/
19. cardiovascular disease.mp. or exp Cardiovascular Diseases/
20. 2 or 3 or 4 or 5 or 6 or 7 or 8 or 9 or 10 or 11 or 12 or 13 or 14 or 15 or 16 or 17 or 18 or 19
21. 1 and 20
22. cohort studies/ or longitudinal studies/ or follow-up studies/ or prospective studies/ or retrospective studies/ or cohort.ti,ab. or longitudinal.ti,ab. or prospective.ti,ab. or retrospective.ti,ab.
23. Case-Control Studies/ or Control Groups/ or Matched-Pair Analysis/ or ((case\* adj5 control\*) or (case adj3 comparison\*) or control group\*).ti,ab.
24. Cross-Sectional Studies/ or cross-sectional.ti,ab. or ("prevalence study" or "incidence study" or "prevalence studies" or "incidence studies" or "transversal studies" or "transversal study").ti,ab.
25. 22 or 23 or 24
26. 21 and 25
27. limit 26 to yr="2011 -Current"

## II. EMBASE

1. asthma.mp. or exp Asthma/
2. exp Comorbidity/ or co-morbidity.mp.
3. multimorbidity.mp.
4. exp Hypersensitivity/ or Allergens/ or Hypersensitivity, Immediate/ or atopy.mp. or exp Immunoglobulin E/ or exp Dermatitis, Atopic/
5. allergic rhinitis.mp. or exp Rhinitis, Allergic/
6. food allergy.mp. or exp Food Hypersensitivity/
7. exp Anaphylaxis/ or anaphylaxis.mp.
8. exp Urticaria/ or urticaria.mp.
9. exp Celiac Disease/ or Autoantibodies/ or exp Autoimmune Diseases/ or autoimmune disorder.mp. or exp Diabetes, Type 1/
10. Thymus Neoplasms/ or endocrine disorder.mp. or Thyroid Gland/ or exp Endocrine System Diseases/ or Thyroid Diseases/
11. exp Obesity/ or exp Diabetes, Type 2/ or metabolic disorder.mp.
12. exp Depression/ or exp Mental Disorder/ or exp Stress, Psychological/ or psychological dysfunction.mp. or Stress Disorder, Post-Traumatic/
13. panic disorders.mp. or exp Panic Disorder/
14. exp Anxiety/ or anxiety.mp.
15. chronic obstructive pulmonary disease.mp. or exp Pulmonary Disease, Chronic Obstructive/
16. exp Hypertension/ or hypertension.mp.
17. exp Gastroesophageal Reflux/ or gastro-oesophageal reflux disease.mp.
18. exp Sleep Apnea, Obstructive/ or exp Sleep Disorder/ or Sleep Apnea Syndromes/ or obstructive sleep apnoea.mp. or Apnea/
19. cardiovascular disease.mp. or exp Cardiovascular Diseases/
20. 2 or 3 or 4 or 5 or 6 or 7 or 8 or 9 or 10 or 11 or 12 or 13 or 14 or 15 or 16 or 17 or 18 or 19
21. 1 and 20
22. cohort studies/ or longitudinal studies/ or follow-up studies/ or prospective studies/ or retrospective studies/ or cohort.ti,ab. or longitudinal.ti,ab. or prospective.ti,ab. or retrospective.ti,ab.
23. Case-Control Studies/ or Control Groups/ or Matched-Pair Analysis/ or ((case\* adj5 control\*) or (case adj3 comparison\*) or control group\*).ti,ab.
24. Cross-Sectional Studies/ or cross-sectional.ti,ab. or ("prevalence study" or "incidence study" or "prevalence studies" or "incidence studies" or "transversal studies" or "transversal study").ti,ab.
25. 22 or 23 or 24
26. 21 and 25
27. limit 26 to yr="2011 -Current"

### III. Web of Science

#4 #3 AND #2 AND #1

Timespan=2011-2015

Search language=Auto

#3 TOPIC: ("cohort study") OR TOPIC: ("longitudinal study") OR TOPIC: ("follow-up study") OR TOPIC: ("prospective study") OR TOPIC: ("retrospective study") OR TOPIC: (cohort) OR TOPIC: (longitudinal) OR TOPIC: (prospective) OR TOPIC: (retrospective) OR TOPIC: ("Case-Control") OR TOPIC: ("Matched-Pair Analysis") OR TOPIC: ("Cross-Sectional") OR TOPIC: ("prevalence study") OR TOPIC: ("incidence study")

Timespan=2011-2015

Search language=Auto

#2 TOPIC: (TOPIC: (Comorbidit\*) OR TOPIC: (multimorbidit\*) OR TOPIC: (Hypersensitivity) OR TOPIC: (Allerg\*) OR TOPIC: ("allergic rhinitis") OR TOPIC: ("Food Hypersensitivity") OR TOPIC: ("food allerg\*") OR TOPIC: (Anaphylaxis) OR TOPIC: (Urticaria) OR TOPIC: ("Autoimmune Disease") OR TOPIC: ("Autoimmune disorder") OR TOPIC: ("Diabetes") OR TOPIC: ("endocrine disorder") OR TOPIC: ("Thyroid disorder") OR TOPIC: ("metabolic disorder") OR TOPIC: (obesity) OR TOPIC: ("Psychological disorder") OR TOPIC: ("Panic Disorder") OR TOPIC: (Anxiety) OR TOPIC: ("chronic obstructive pulmonary disease") OR TOPIC: ("Pulmonary Disease") OR TOPIC: (Hypertension) OR TOPIC: ("gastro-oesophageal reflux disease") OR TOPIC: ("cardiovascular disease") OR TOPIC: ("Sleep Apnea"))

Timespan=2011-2015

Search language=Auto

#1 TOPIC: (asthma)

Timespan=2011-2015

Search language=Auto

#### IV. CINAHL

| #   | Query Limiters/Expanders                                                                                                                                                        | Last Run Via                             | ResultsAction |
|-----|---------------------------------------------------------------------------------------------------------------------------------------------------------------------------------|------------------------------------------|---------------|
| S30 | S27 AND S28 Limiters - Publication Year: 2011-2015                                                                                                                              |                                          |               |
|     | Search modes - Find all my search terms                                                                                                                                         | Interface - EBSCOhost Research Databases |               |
|     | Search Screen - Advanced Search                                                                                                                                                 |                                          |               |
|     | Database - CINAHL Plus                                                                                                                                                          | 1,391                                    | Edit S30      |
| S29 | S27 AND S28 Search modes - Find all my search terms                                                                                                                             | Interface - EBSCOhost Research Databases |               |
|     | Search Screen - Advanced Search                                                                                                                                                 |                                          |               |
|     | Database - CINAHL Plus                                                                                                                                                          | 3,845                                    | Edit S29      |
| S28 | S23 OR S24 OR S25 Search modes - Find all my search terms                                                                                                                       | Interface - EBSCOhost Research Databases |               |
|     | Search Screen - Advanced Search                                                                                                                                                 |                                          |               |
|     | Database - CINAHL Plus                                                                                                                                                          | 411,852                                  | Edit S28      |
| S27 | S1 AND S26 Search modes - Find all my search terms                                                                                                                              | Interface - EBSCOhost Research Databases |               |
|     | Search Screen - Advanced Search                                                                                                                                                 |                                          |               |
|     | Database - CINAHL Plus                                                                                                                                                          | 27,111                                   | Edit S27      |
| S26 | S2 OR S3 OR S4 OR S5 OR S6 OR S7 OR S8 OR S9 OR S10 OR S11 OR S12 OR S13 OR S14 OR S15 OR S16 OR S17 OR S18 OR S19 OR S20 OR S21 OR S22 Search modes - Find all my search terms | Interface - EBSCOhost Research Databases |               |
|     | Search Screen - Advanced Search                                                                                                                                                 |                                          |               |
|     | Database - CINAHL Plus                                                                                                                                                          | 748,799                                  | Edit S26      |
| S25 | (MH "Cross Sectional Studies") OR "Cross-Sectional Studies" Search modes - Find all my search terms                                                                             | Interface - EBSCOhost Research Databases |               |
|     | Search Screen - Advanced Search                                                                                                                                                 |                                          |               |
|     | Database - CINAHL Plus                                                                                                                                                          | 108,137                                  | Edit S25      |
| S24 | (MH "Case Control Studies") OR "Case-Control Studies" Search modes - Find all my search terms                                                                                   | Interface - EBSCOhost Research Databases |               |
|     | Search Screen - Advanced Search                                                                                                                                                 |                                          |               |
|     | Database - CINAHL Plus                                                                                                                                                          | 51,374                                   | Edit S24      |
| S23 | (MH "Prospective Studies") OR "cohort studies" Search modes - Find all my search terms                                                                                          | Interface - EBSCOhost Research Databases |               |
|     | Search Screen - Advanced Search                                                                                                                                                 |                                          |               |
|     | Database - CINAHL Plus                                                                                                                                                          | 277,306                                  | Edit S23      |
| S22 | (MH "Cardiovascular Diseases+") OR "cardiovascular disease" Search modes - Find all my search terms                                                                             | Interface - EBSCOhost Research Databases |               |
|     | Search Screen - Advanced Search                                                                                                                                                 |                                          |               |
|     | Database - CINAHL Plus                                                                                                                                                          | 386,904                                  | Edit S22      |
| S21 | (MH "Sleep Apnea Syndromes+") OR (MH "Sleep Apnea, Obstructive") OR "Sleep Apnea" Search modes - Find all my search terms                                                       | Interface - EBSCOhost Research Databases |               |
|     | Search Screen - Advanced Search                                                                                                                                                 |                                          |               |
|     | Database - CINAHL Plus                                                                                                                                                          | 10,336                                   | Edit S21      |
| S20 | (MH "Gastroesophageal Reflux") OR "Gastroesophageal Reflux" Search modes - Find all my search terms                                                                             | Interface - EBSCOhost Research Databases |               |
|     | Search Screen - Advanced Search                                                                                                                                                 |                                          |               |
|     | Database - CINAHL Plus                                                                                                                                                          | 5,683                                    | Edit S20      |

S19 (MH "Hypertension+") OR "Hypertension" Search modes - Find all my search terms  
Interface - EBSCOhost Research Databases  
Search Screen - Advanced Search  
Database - CINAHL Plus 65,449 Edit S19

S18 (MH "Pulmonary Disease, Chronic Obstructive+") OR "chronic obstructive pulmonary disease" OR (MH "Lung Diseases, Obstructive+") Search modes - Find all my search terms  
Interface - EBSCOhost Research Databases  
Search Screen - Advanced Search  
Database - CINAHL Plus 43,363 Edit S18

S17 (MH "Anxiety+") OR "Anxiety" Search modes - Find all my search terms  
Interface - EBSCOhost Research Databases  
Search Screen - Advanced Search  
Database - CINAHL Plus 52,157 Edit S17

S16 (MH "Panic Disorder") OR "panic disorder" Search modes - Find all my search terms  
Interface - EBSCOhost Research Databases  
Search Screen - Advanced Search  
Database - CINAHL Plus 1,682 Edit S16

S15 (MH "Depression+") OR "Depression" Search modes - Find all my search terms  
Interface - EBSCOhost Research Databases  
Search Screen - Advanced Search  
Database - CINAHL Plus 98,022 Edit S15

S14 (MH "Diabetes, Type 2") OR (MH "Diabetes, Type 1+") OR (MH "Diabetes +") OR "Diabetes" Search modes - Find all my search terms Interface - EBSCOhost Research Databases  
Search Screen - Advanced Search  
Database - CINAHL Plus 112,269 Edit S14

S13 (MH "Obesity+") OR "Obesity" OR (MH "Obesity, Morbid") Search modes - Find all my search terms Interface - EBSCOhost Research Databases  
Search Screen - Advanced Search  
Database - CINAHL Plus 73,423 Edit S13

S12 "metabolic disorder" Search modes - Find all my search terms Interface - EBSCOhost Research Databases  
Search Screen - Advanced Search  
Database - CINAHL Plus 304 Edit S12

S11 "endocrine disorder" Search modes - Find all my search terms Interface - EBSCOhost Research Databases  
Search Screen - Advanced Search  
Database - CINAHL Plus 117 Edit S11

S10 (MH "Thyroid Diseases+") OR "Thyroid Diseases" Search modes - Find all my search terms Interface - EBSCOhost Research Databases  
Search Screen - Advanced Search  
Database - CINAHL Plus 10,471 Edit S10

S9 (MH "Autoimmune Diseases") OR "Autoimmune Diseases" Search modes - Find all my search terms Interface - EBSCOhost Research Databases  
Search Screen - Advanced Search  
Database - CINAHL Plus 5,816 Edit S9

S8 (MH "Celiac Disease") OR "Celiac Disease" Search modes - Find all my search terms Interface - EBSCOhost Research Databases  
Search Screen - Advanced Search  
Database - CINAHL Plus 3,248 Edit S8

S7 (MH "Urticaria") OR "Urticaria" Search modes - Find all my search terms  
Interface - EBSCOhost Research Databases  
Search Screen - Advanced Search  
Database - CINAHL Plus 1,505 Edit S7

S6 (MH "Anaphylaxis") OR "Anaphylaxis" Search modes - Find all my search terms  
Interface - EBSCOhost Research Databases  
Search Screen - Advanced Search  
Database - CINAHL Plus 3,208 Edit S6

S5 (MH "Food Hypersensitivity") OR "food allergy" Search modes - Find all my  
search terms Interface - EBSCOhost Research Databases  
Search Screen - Advanced Search  
Database - CINAHL Plus 3,880 Edit S5

S4 (MH "Rhinitis, Allergic, Perennial") OR (MH "Rhinitis, Allergic, Seasonal") OR  
(MH "Dermatitis, Atopic") Search modes - Find all my search terms Interface -  
EBSCOhost Research Databases  
Search Screen - Advanced Search  
Database - CINAHL Plus 4,023 Edit S4

S3 (MH "Hypersensitivity+") OR (MH "Hypersensitivity, Immediate") Search  
modes - Find all my search terms Interface - EBSCOhost Research Databases  
Search Screen - Advanced Search  
Database - CINAHL Plus 49,092 Edit S3

S2 (MH "Comorbidity") Search modes - Find all my search terms Interface -  
EBSCOhost Research Databases  
Search Screen - Advanced Search  
Database - CINAHL Plus 38,672 Edit S2

S1 (MH "Asthma+") OR "asthma" Search modes - Find all my search terms  
Interface - EBSCOhost Research Databases  
Search Screen - Advanced Search  
Database - CINAHL Plus 29,402

## V. PsycINFO

1. asthma.mp. or exp Asthma/
2. exp Comorbidity/ or co-morbidity.mp.
3. multimorbidity.mp.
4. exp Hypersensitivity/ or Allergens/ or Hypersensitivity, Immediate/ or atopy.mp. or exp Immunoglobulin E/ or exp Dermatitis, Atopic/
5. allergic rhinitis.mp. or exp Rhinitis, Allergic/
6. food allergy.mp. or exp Food Hypersensitivity/
7. exp Anaphylaxis/ or anaphylaxis.mp.
8. exp Urticaria/ or urticaria.mp.
9. exp Celiac Disease/ or Autoantibodies/ or exp Autoimmune Diseases/ or autoimmune disorder.mp. or exp Diabetes, Type 1/
10. Thymus Neoplasms/ or endocrine disorder.mp. or Thyroid Gland/ or exp Endocrine System Diseases/ or Thyroid Diseases/
11. exp Obesity/ or exp Diabetes, Type 2/ or metabolic disorder.mp.
12. exp Depression/ or exp Mental Disorder/ or exp Stress, Psychological/ or psychological dysfunction.mp. or Stress Disorder, Post-Traumatic/
13. panic disorder.mp. or exp Panic Disorder/
14. exp Anxiety/ or anxiety.mp.
15. chronic obstructive pulmonary disease.mp. or exp Pulmonary Disease, Chronic Obstructive/
16. exp Hypertension/ or hypertension.mp.
17. exp Gastroesophageal Reflux/ or gastro-oesophageal reflux disease.mp.
18. exp Sleep Apnea, Obstructive/ or exp Sleep Disorder/ or Sleep Apnea Syndromes/ or obstructive sleep apnoea.mp. or Apnea/
19. cardiovascular disease.mp. or exp Cardiovascular Disease/
20. 2 or 3 or 4 or 5 or 6 or 7 or 8 or 9 or 10 or 11 or 12 or 13 or 14 or 15 or 16 or 17 or 18 or 19
21. 1 and 20
22. cohort studies/ or longitudinal studies/ or follow-up studies/ or prospective studies/ or retrospective studies/ or cohort.ti,ab. or longitudinal.ti,ab. or prospective.ti,ab. or retrospective.ti,ab.
23. Case-Control Studies/ or Control Groups/ or Matched-Pair Analysis/ or ((case\* adj5 control\*) or (case adj3 comparison\*) or control group\*).ti,ab.
24. Cross-Sectional Studies/ or cross-sectional.ti,ab. or ("prevalence study" or "incidence study" or "prevalence studies" or "incidence studies" or "transversal studies" or "transversal study").ti,ab.
25. 22 or 23 or 24
26. 21 and 25
27. limit 26 to yr="2011 -Current"

## VI. Google Scholar (first 100 results will be considered)

1. Asthma and comorbidity\*
